# Supplementary material for: The effects of exercise on oxidative stress MDA and SOD in patients with type 2 diabetes: a systematic review and meta-analysis
Source: PeerJ journal article supplement (doi:10.7717/peerj.19814), 2025-08-21

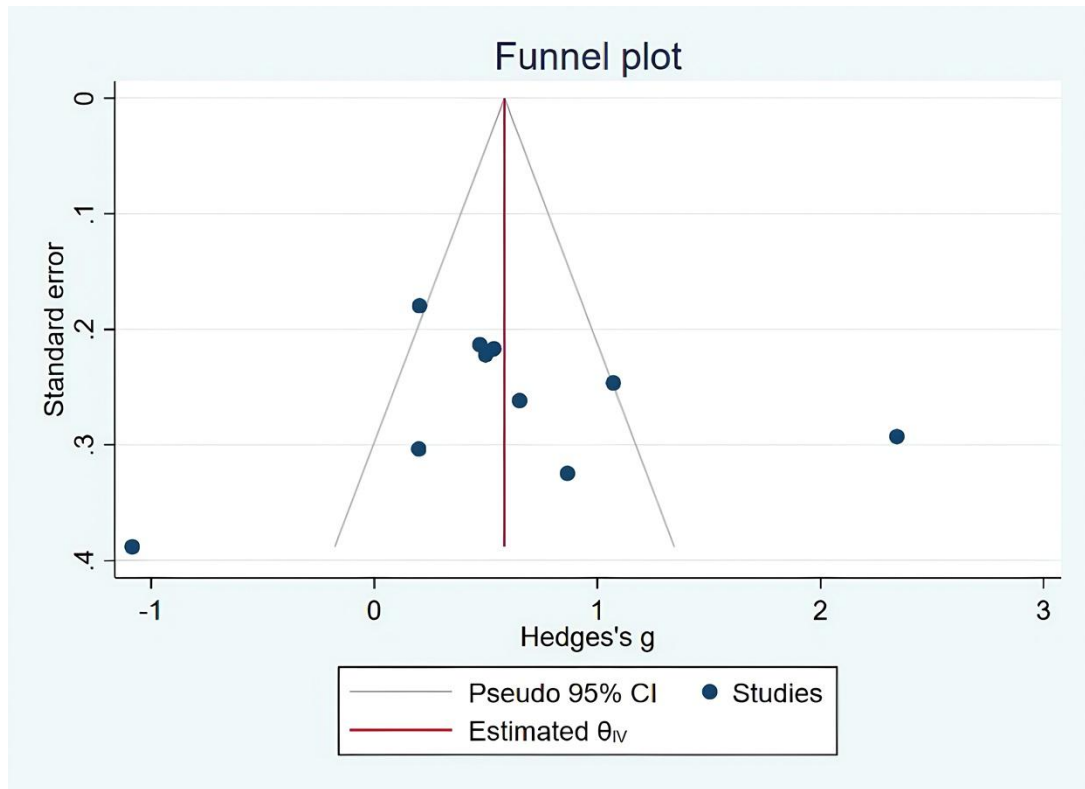

Supplement: FigureS4.pdf [file FigureS4.pdf]
