# Supplementary material for: The effects of exercise on oxidative stress MDA and SOD in patients with type 2 diabetes: a systematic review and meta-analysis
Source: PeerJ journal article supplement (doi:10.7717/peerj.19814), 2025-08-21
Supplement: FigureS5.pdf [file FigureS5.pdf]

Exercise for Type 2 Diabetes

Patient or population: Type 2 Diabetes

Settings:

Intervention: Exercise

| Outcomes | Illustrative comparative risks* (95% CI) |                                                                                                            | Relative effect (95% CI) | No of Participants (studies) | Quality of the evidence (GRADE) | Comments |
|----------|------------------------------------------|------------------------------------------------------------------------------------------------------------|--------------------------|------------------------------|---------------------------------|----------|
|          | Assumed risk<br>Control                  | Corresponding risk<br>Exercise                                                                             |                          |                              |                                 |          |
| MDA      |                                          | The mean mda in the intervention groups was <b>1.29 standard deviations lower</b> (0 higher to 0.71 lower) |                          | 1137<br>(10 studies)         | ⊕⊕⊕⊖<br>moderate                |          |
| SOD      |                                          | The mean sod in the intervention groups was <b>0.59 standard deviations higher</b> (0.17 to 1.01 higher)   |                          | 705<br>(7 studies)           | ⊕⊕⊕⊕<br>high                    |          |

\*The basis for the **assumed risk** (e.g. the median control group risk across studies) is provided in footnotes. The **corresponding risk** (and its 95% confidence interval) is based on the assumed risk in the comparison group and the **relative effect** of the intervention (and its 95% CI).

CI: Confidence interval;

GRADE Working Group grades of evidence

**High quality:** Further research is very unlikely to change our confidence in the estimate of effect.

**Moderate quality:** Further research is likely to have an important impact on our confidence in the estimate of effect and may change the estimate.

**Low quality:** Further research is very likely to have an important impact on our confidence in the estimate of effect and is likely to change the estimate.

**Very low quality:** We are very uncertain about the estimate.
